1 Biological Evaluation of Molecules of the azaBINOL Class as Antiviral Agents:  
2 Specific Inhibition of HIV-1 RNase H Activity by 7-Isopropoxy-8-(naphth-1-yl)quinoline

3

4

5

6 Ross D. Overacker,<sup>1</sup> Somdev Banerjee,<sup>1</sup> George F. Neuhaus,<sup>1</sup> Selena Milicevic Sephton,<sup>1</sup>  
7 Alexander Herrmann,<sup>2</sup> James A. Strother,<sup>3</sup> Ruth Brack-Werner,<sup>2</sup> Paul R. Blakemore,<sup>1</sup> and Sandra  
8 Loesgen<sup>1\*</sup>

9

10 <sup>1</sup>Department of Chemistry, Oregon State University, Corvallis, OR 97331, USA.

11 <sup>2</sup>Institute of Virology, Helmholtz Zentrum München, German Research Center for  
12 Environmental Health, Ingolstädter Landstraße 1, D-85764 Neuherberg, Germany

13 <sup>3</sup>Department of Integrative Biology, Oregon State University, Corvallis, OR 97331, USA.

14

15 E-mail: [sandra.loesgen@oregonstate.edu](mailto:sandra.loesgen@oregonstate.edu)

16 KEYWORDS: azaBINOL, HIV-1 inhibition, HIV reverse transcriptase, RNase H

17

## 18 **Abstract**

19       Inspired by bioactive biaryl-containing natural products found in plants and the marine  
20 environment, a series of synthetic compounds belonging to the azaBINOL chiral ligand family  
21 was evaluated for antiviral activity against HIV-1. Testing of 39 unique azaBINOLs in a single-  
22 round infectivity assay resulted in the identification of three promising antiviral compounds,  
23 including 7-isopropoxy-8-(naphth-1-yl)quinoline (azaBINOL **B#24**), which exhibited low-  
24 micromolar activity. The active compounds and several close structural analogues were further  
25 tested against three different HIV-1 envelope pseudotyped viruses as well as in a full-virus  
26 replication system (EASY-HIT). Mode-of-action studies using a time-of-addition assay indicated  
27 that azaBINOL **B#24** acts after viral entry but before viral assembly and budding. HIV-1 reverse  
28 transcriptase (RT) assays that individually test for polymerase and RNase H activity were used to  
29 demonstrate that **B#24** inhibits RNase H activity, most likely allosterically. Further binding  
30 analysis using bio-layer interferometry (BLI) showed that **B#24** interacts with HIV-1 RT in a  
31 highly specific manner. These results indicate that azaBINOL **B#24** is a potentially viable, novel  
32 lead for the development of new HIV-1 RNase H inhibitors. Furthermore, this study  
33 demonstrates that the survey of libraries of synthetic compounds, designed purely with the goal  
34 of facilitating chemical synthesis in mind, may yield unexpected and selective drug leads for the  
35 development of new antiviral agents.

36

## 37 **1. Introduction**

38  
39 HIV/AIDS continues to be a major global health epidemic. In 2017, there were 36.9 million  
40 people living with HIV worldwide and an additional 1.8 million people became newly infected.<sup>1</sup>  
41 Despite substantial efforts towards vaccine development, there are currently no FDA-approved  
42 vaccines and management of HIV infection requires long-term treatment with potent anti-HIV  
43 drugs.<sup>2</sup> Although drug regimens such as antiretroviral therapy (ART) are able to keep HIV viral  
44 load low in infected patients, these treatments are typically limited by adverse side effects,  
45 increasing drug resistance, high costs, and global availability shortages.<sup>3</sup> Currently, therapeutic  
46 antiviral drugs target different phases of the HIV lifecycle including viral attachment, fusion,  
47 reverse transcription, integration, and protease activity. Treatments often utilize multiple drugs in  
48 combination to combat the rapid emergence of chemoresistant viruses.<sup>3</sup> Therefore, novel  
49 therapeutics that act on previously untargeted steps of the viral life cycle are urgently needed to  
50 circumvent the onset of drug resistance and to improve treatments.<sup>4</sup>

51 HIV reverse transcriptase (RT) has been successfully targeted with first and second-  
52 generation non-nucleosides reverse transcriptase inhibitors (NNRTIs) as exemplified by  
53 nevirapine, first introduced in 1996, and more recently rilpivirine, in 2011.<sup>5,6</sup> Out of the 27  
54 currently FDA approved HIV drugs on the market, 13 of them target RT polymerase activity,  
55 including the NNRTIs.<sup>7</sup> However, the reverse transcriptase enzyme is a multifunctional protein  
56 and no drugs have been developed yet that target the RT ribonuclease H (RNase H) activity,  
57 which has recently been validated as a target for small molecule drug intervention.<sup>8,9</sup> HIV RT is  
58 responsible for converting the single-stranded viral RNA genome to a double-stranded DNA for  
59 subsequent integration into the genome of the host cell. The heterodimeric RT protein (p66/p51)  
60 has separate active sites for polymerase and RNase H activity. The polymerase starts the

61 synthesis of DNA by first copying the viral RNA genome and forming RNA:DNA hybrids while  
62 RNase H catalyzes the degradation of RNA in DNA:RNA hybrids to finally form duplex DNA.<sup>10</sup>  
63 The RNase H active site contains two bivalent Mg<sup>2+</sup> ions that chelate and cleave the RNA  
64 phosphate backbone by directing a nucleophilic water molecule towards the phosphate linkage.<sup>11</sup>  
65 It has been shown that RNase H activity can be abolished through Mg<sup>2+</sup> chelation in the active  
66 site or through allosteric binding near the NNRTI site causing conformational changes.<sup>9</sup> The  
67 addition of novel antiviral drugs that target RNase H activity to current combinatorial regimens  
68 would introduce a new synergistic method of HIV-1 inhibition greatly improving efficacy of  
69 treatment options.

70 To identify novel leads for drug discovery efforts one may look to sources of compounds that  
71 have been either infrequent explored or else untapped in prior studies. Notable in this regard are  
72 the numerous ostensibly artificial organic molecules that have been introduced as chiral metal  
73 ligands and/or organocatalysts for the purpose of facilitating catalytic enantioselective syntheses.  
74 The structural features present in such molecules that are necessary for their intended function  
75 (e.g., chiral scaffolds with few rotatable bonds, donor sites from atoms with lone pairs, hydrogen-  
76 bond acceptors and donors, sites of localized charge density, zones of steric encumbrance, etc.)  
77 could also lead to meaningful and potentially specific interactions with proteins and other classes  
78 of biomolecules involved in various diseases. Axially chiral biaryl compounds based on 1,1'-  
79 binaphthyl scaffolds are considered a 'privileged' class of reagents for enantioselective synthesis  
80 and the principal member of this group, 1,1'-bi-2-naphthol (BINOL, **1**), has become one of the  
81 most widely used ligands for stoichiometric and catalytic asymmetric reactions.<sup>12</sup> While BINOL  
82 itself has previously been found to be cytotoxic, many other biaryl compounds, either found in  
83 nature or of artificial origin, have shown potent and selective bioactivities.<sup>13,14</sup> For example, the

84 axially chiral dimeric naphthylisoquinolone alkaloids first isolated from *Anicistrocladus*  
85 *korupensis* in 1991 and later named the michellamines, exhibit selective anti-HIV activity.<sup>15-19</sup>  
86 Given these facts taken together with the existence of other antiviral biaryl natural products (e.g.,  
87 dioncophylline<sup>20</sup>) and recently identified synthetic antiviral drug leads with multiple aromatic  
88 ring systems (e.g., arbidol,<sup>21</sup> peptide triazoles,<sup>22</sup> rhodanine derivatives,<sup>23</sup> naphthylhydrazones,<sup>24</sup>  
89 and hydroxypyridones<sup>25</sup>), we elected to test a library of heterocyclic biaryl compounds available  
90 to us and belonging to the so-called 'azaBINOL' chiral ligand family for inhibition of HIV-1  
91 infection.

92 The azaBINOLs are nitrogenous analogs of BINOL based on isostructural 8-(naphth-1-  
93 yl)quinoline (**2**, 8-azaBINOL)<sup>26</sup> and 8,8'-biquinolyl (**3**, 8,8'-diazBINOL)<sup>27-29</sup> motifs (Figure 1).  
94 These molecules have been a focus of interest both from a fundamental standpoint<sup>26, 30, 31</sup> and for  
95 their potential utility in enantioselective synthesis,<sup>32, 33</sup> but prior to this work, studies of any  
96 aspect of the biological activity of azaBINOLs had yet to be reported. Herein, we show that  
97 deoxy-8-azaBINOL derivatives provide a novel scaffold for the inhibition of HIV-1 RT RNase H  
98 activity. Our lead compound, the isopropyl ether derivative of 2'-deoxy-8-azaBINOL (**B#24**),  
99 shows unoptimized low micromolar activity (4-9  $\mu$ M range) in an HIV single round infectivity  
100 assay as well as in fully infectious viral assays with low cytotoxicity and a selectivity index  
101 of 14.

102

## 103 2. Chemistry

104 A significant advantage of the azaBINOL family of molecules as compared to their all  
105 carbocyclic BINOL congeners is the ease of derivatization of the quinoline nucleus and therefore  
106 the facility with which essentially any position of azaBINOL scaffolds can be decorated with  
107 ancillary functionality.<sup>29</sup> Of the six compounds of primary interest herein (*vide infra*, see Figure  
108 2), only the quinol-type 2'-deoxy-8-azaBINOL carbamate derivative **B#43** was previously  
109 described in the literature.<sup>26</sup> The five new compounds were prepared from known deoxy  
110 azaBINOLs (**4**, **5**, and **6**) via straightforward alkylation and acylation reactions (Scheme 1).  
111 Carbamate **B#43**, itself accessed by Suzuki-Miyauri cross-coupling of an 8-iodoquinoline and 1-  
112 naphthaleneboronic acid,<sup>26</sup> was converted to isopropyl ether **B#24** by saponification to quinol **4**  
113 followed by Williamson ether synthesis (Scheme 1). The other four compounds, naphthol-type 2-  
114 deoxy-8-azaBINOL derivatives **B#59** and **B#60** and 2-deoxy-8,8'-diazabINOL derivatives **B#57**  
115 and **B#58**, were prepared from the corresponding phenols **5** and **6**. As hitherto reported, phenols  
116 **5** and **6** are themselves efficiently prepared by N-directed oxidative CH functionalization of 8-  
117 (naphth-1-yl)quinoline<sup>26</sup> and 8,8'-biquinolyl,<sup>29</sup> respectively. All six of the azaBINOLs of main  
118 focus were prepared and tested for biological activity in racemic form. The configurational  
119 stability of these axially chiral compounds has yet to be determined, however, their racemization  
120 half-lives are likely to be significantly higher than those of quinol **4** [ $\tau_{1/2(\text{rac.})} = 120$  h in MeOH at  
121 24 °C] and naphthol **5** [ $\tau_{1/2(\text{rac.})} = 89$  h in MeOH at 24 °C] which have been measured as  
122 indicated.<sup>26</sup>

## 123 3. Results

### 124 3.1 HIV-1 *in vitro* activity screening of azaBINOL compounds

125 A library of 39 unique azaBINOLs and two BINOLs was screened for antiviral HIV-1  
126 activity using a pseudo-typed viral particle, single round infectivity assay (HIVpp) (see  
127 Supporting Information for full screening data and structures of all library members; all  
128 compounds were screened in racemic form and four were additionally evaluated as their  
129 enantiopure (*aS*)- and (*aR*)-atropisomers). Antiviral activity was compared directly to compound  
130 cytotoxicity using a standard MTT-based cell viability assay to assess selectivity indices of  
131 compounds. Initial screening efforts at single-dose concentrations (10 µg/mL) of the full  
132 compound library revealed three compounds with low micromolar anti-HIV activity: **B#24**,  
133 **B#43**, and **B#60** (Figure 2). These compounds, an isopropyl ether (**B#24**) and two carbamate  
134 derivatives (**B#43** and **B#60**) of deoxy-8-azaBINOL molecules, showed high viral inhibitory  
135 activity with only minor cytotoxicity and warranted further investigation. Closer analysis of the  
136 compound library revealed three additional azaBINOLs sharing similar structural features to the  
137 aforementioned active compounds: a naphthol-type regioisomer of quinol-type ether **B#24**  
138 (**B#59**), as well as 2-deoxy-8,8'-diazabinol congeners of the isopropyl ethers and carbamates  
139 (**B#57** and **B#58**). Despite the close structural similarities of these compounds, they showed little  
140 antiviral activity as compared to **B#24**, **B#43**, and **B#60** (Figure 2). HIV antiviral activity was  
141 evident for the isopropyl ether and carbamate derivatives of 2- and 2'-deoxy-8-azaBINOL but it  
142 was notably completely absent for the corresponding 2-deoxy-8,8'-diazabinol series of  
143 compounds. Due to the close structural similarities between the active isopropyl ether and  
144 carbamate compounds to their non-active counterparts in the HIVpp assay, we decided to move  
145 all six compounds forward for further activity explorations.

146 Antiviral activity of the isopropyl ether compounds **B#24**, **B#59**, **B#57** and the carbamate  
147 derivatives **B#43**, **B#60**, and **B#58** was assessed against three different HIV-1 enveloped pseudo-

148 typed particles with differing tropism including HXB2, YU2, and 89.6 (Table 1). All six of the  
149 azaBINOL compounds showed similar activities across all viral variants. Quinol-type 2'-deoxy-  
150 8-azaBINOL ether **B#24** in particular showed low micromolar HIV-1 neutralization against each  
151 of the strains tested with activity similar to other antiviral drugs such as abacavir.<sup>34</sup> Although the  
152 naphthol-type 2-deoxy-8-azaBINOL ether **B#59** did show minor antiviral activity at high  
153 concentrations, its IC<sub>50</sub> was greater than the concentrations tested and significantly larger in  
154 comparison to the closely related quinol-type ether **B#24**, which has an IC<sub>50</sub> value of 4 - 8 μM.  
155 The significant difference in antiviral activity of these two regioisomers (**B#24** and **B#59**) hints  
156 towards a highly specific and selective mode of inhibition. The corresponding carbamate  
157 derivatives of deoxy-8-azaBINOLs, **B#43** and **B#60**, both showed moderate antiviral activity  
158 against all three viral strains but with smaller selectivity indices. Again, neither of the 2-deoxy-  
159 8,8'-diazabINOL derivatives, **B#57** or **B#58**, showed any antiviral activity at concentrations up  
160 to 200 μM.

161 Next we used the EASY-HIT full viral infection assay system<sup>35</sup> to test all six isopropyl ether  
162 and carbamate azaBINOL derivatives against fully-infectious, replication competent HIV-1<sub>LAI</sub>  
163 (Table 2). The quinol-type 2'-deoxy-8-azaBINOL ether **B#24** continued to exhibit low  
164 micromolar antiviral activity in the EASY-HIT assay system in accordance with results obtained  
165 from the HIVpp assay. Surprisingly, the naphthol-type 2-deoxy-8-azaBINOL ether **B#59**  
166 exhibited increased antiviral activity. The deoxy-8-azaBINOL carbamate derivatives **B#43** and  
167 **B#60** gave similar high micromolar viral neutralization but also displayed comparable  
168 cytotoxicity. The analogous 2-deoxy-8,8'-diazabINOL compounds, **B#57** and **B#58**, showed no  
169 antiviral activity or cytotoxicity at concentrations tested up to 200 μM.



170 Out of the 41 unique compounds originally screened for anti-HIV-1 activity, one compound,  
171 quinol-type 2'-deoxy-8-azaBINOL ether **B#24**, stands out with selective antiviral activity and a  
172 favorable selectivity index. Small changes to its structure, including moving the isopropyl ether  
173 substituent to the naphthyl ring system (**B#59**), or the introduction of an additional aromatic ring-  
174 bound nitrogen atom (**B#57**), results in drastically reduced antiviral activity. While the deoxy-8-  
175 azaBINOL carbamate derivatives **B#43** and **B#60** do exhibit antiviral activity in the phenotypic  
176 assays, they also show significant cytotoxicity and therefore their apparent antiviral activity is  
177 likely due to interference with the cell-based assay. The low micromolar antiviral activity of lead  
178 compound **B#24** encouraged us to explore its mode-of-action.

### 179 **3.2 AzaBINOLS are not pan-assay interference compounds (PAINS)**

180 Promiscuous inhibitors in high-throughput screening endeavors often lead to unproductive  
181 identification and development of compounds with non-specific activity.<sup>36</sup> For example, cell-  
182 based assays requiring a colorimetric out-read can be inhibited through non-specific mechanisms  
183 giving false-positive results.<sup>37</sup> The cell-based HIVpp used in this study contains a luciferase  
184 reporter out read, so we looked to test the capacity of **B#24** to directly inhibit luciferase  
185 luminescence in a recombinant luciferase enzyme test (SI Figure 6).<sup>38</sup> **B#24** showed no inhibition  
186 of luciferase activity nor quenching at any concentrations tested verifying that it was not acting  
187 on luminescence. Additionally, based on the low solubility and largely hydrophobic surface area  
188 of **B#24**, we sought to probe its ability to inhibit HIV-1 through unspecific aggregation effects.  
189 We tested the ability for **B#24** to aggregate at higher concentrations in aqueous conditions via an  
190 <sup>1</sup>H-NMR dilution study (SI Figure 7).<sup>39</sup> Five concentrations of **B#24** were tested from 200  $\mu$ M to  
191 12  $\mu$ M in 50 mM phosphate buffer made with D<sub>2</sub>O and 1% DMSO-d<sub>6</sub>. No changes were seen in

192 the number of resonances, peak shape, or chemical shift values indicating that **B#24** does not  
193 aggregate under the test conditions.

### 194 **3.3 Time-of-addition assay**

195 The single round infectivity assay using HIV-1 enveloped pseudotyped viruses is able to  
196 report on inhibition of early stages of infection including cell entry, reverse transcription, and  
197 integration steps. The active azaBINOL compound **B#24** inhibited all HIV-1 strains tested  
198 regardless of their differing viral tropism (HXB2, YU2, and 89.6). This broad inhibition  
199 indicated that the antiviral mode-of-action is unlikely to rely on the viral fusion process, as  
200 changing the surface glycoprotein does not affect antiviral activity. Additionally, the EASY-HIT  
201 assay indicated that **B#24** is active prior to viral packing and budding. To further delineate the  
202 stage of the virus replication cycle inhibited by **B#24**, a time-of-addition assay was performed  
203 using HIV-1 pseudotyped particles. Compound **B#24** as well as the standard inhibitors temsavir  
204 and efavirenz were added at different time points post exposure of the cell to virus to evaluate  
205 their inhibitory activity throughout viral infection (Figure 3). Our results show that **B#24** does  
206 not act on the initial viral-entry step when compared to the activity of HIV-1 entry inhibitor  
207 temsavir, which loses activity if dosed post viral entry. Instead, **B#24** remains active throughout  
208 the assay, but exhibits a subtle decrease in antiviral activity between 6-8 hours post infection.  
209 Next, we sought to explore viral enzyme interactions directly to verify if **B#24** interacts with the  
210 HIV RT dual functions (DNA polymerase and/or RNase H activity) or HIV integrase.

### 211 **3.4 Activity of B#24 against HIV-1 reverse transcriptase**

212 NNRTI binding to the HIV RT enzyme occurs at a distant, allosteric binding site and the  
213 long-distance effects on the RT polymerase activity are well documented.<sup>10</sup> In contrast, inhibitors  
214 of the HIV RT enzyme that target its RNase H function directly affect the catalytic side with its

215  $Mg^{2+}$  ions, and therefore are often dual inhibitors, with effects on reverse transcriptase and  
216 integrase as both require bivalent metals in their active site. We screened **B#24** for inhibitory  
217 activity in recombinant protein-based assays to test for HIV-1 RT and/or integrase antiviral  
218 inhibition (Table 3). AzaBINOL **B#24** showed no effect against HIV-1 integrase activity in a  
219 commercially available kit (ExpressBio, Frederick, MD) at any concentration tested up to 200  
220  $\mu M$ . When tested against an HIV-1 RT polymerase assay we observed only weak inhibitory  
221 effects for **B#24** at concentrations higher than 100  $\mu M$ , several orders of magnitude weaker than  
222 seen in our cell-based assays.

223 However, since RNase H activity, the second catalytic activity of the HIV-1 reverse  
224 transcriptase, is not detected in the above RT-polymerase assay, we investigated the effect of  
225 **B#24** on RNase H activity using a previously reported FRET based approach.<sup>40, 41</sup> Here, we used  
226 a pair of oligonucleosides including an 18-mer strand of RNA containing a 3'-fluorescein  
227 modification and an 18-mer strand of DNA with a 5'-dabcyl quencher modification. When RNA  
228 is cleaved from the RNA/DNA hybrid by RNase H activity, the fluorescent probe is removed  
229 from its quenching partner (dabcyl) resulting in fluorescence. We found that **B#24** inhibited  
230 RNase H activity of HIV RT with an  $IC_{50}$  of 14.2  $\mu M$ , within the same range as the low  
231 micromolar cell-based assay results (Table 3).

232 Several classes of compounds have shown promising antiviral activity by acting on RNase H  
233 activity including N-hydroxyimides,<sup>42</sup> tropolones,<sup>43, 44</sup> hydroxypyridonecarboxylic acids,<sup>25, 45, 46</sup>  
234 diketoacids,<sup>47</sup> vinylogous ureas,<sup>48</sup> and thienopyrimidinones;<sup>49</sup> the majority of which target the  
235 active site of RNase H through  $Mg^{2+}$  ion chelation. With this in mind, we sought to probe  
236 whether azaBINOL **B#24** was inhibiting RNase H via the active site using a  $Mg^{2+}$  ion chelation  
237 and absorbance test.  $Mg^{2+}$  ions present in the active site of RNase H are an integral part of its

238 endonuclease function and various inhibitors have been shown to interfere with their chelating  
239 properties.<sup>8,9</sup> Compound **B#24** was tested for Mg<sup>2+</sup> binding by assessment of its UV absorption  
240 under an increasing concentration of Mg<sup>2+</sup> following existing procedures.<sup>50</sup> No UV absorbance  
241 changes were observed with the addition of Mg<sup>2+</sup> up to 120 mM with **B#24** (100 μM) (Figure 4).  
242 Therefore, we conclude that **B#24** is not interacting with Mg<sup>2+</sup> ions and subsequently is not  
243 directly inhibiting RNase H activity through active site binding. Instead, it is likely that **B#24**  
244 inhibits RNase H enzyme activity allosterically, without affecting the polymerase function of  
245 RT. The azaBINOL compound **B#24** adds a new structural class to emerging group of selective  
246 HIV RNase H inhibitors including dihydroxy benzoyl naphthyl hydrazone (DHBNH),<sup>24</sup> various  
247 derivatives of vinylogous ureas,<sup>48,51</sup> as well as cycloheptathiophene-3-carboxamides (cHTC).<sup>52</sup>  
248 <sup>53</sup> Allosteric binding may exhibit fewer side effects compared to active site Mg<sup>2+</sup> chelating  
249 inhibitors and therefore allow for a more favorable therapeutic window.<sup>8,9</sup>

### 250 **3.5 HIV-1 reverse transcriptase binding**

251 To show that **B#24** inhibits RNase H activity by binding the HIV-1 reverse transcriptase  
252 enzyme, we explored direct binding to immobilized HIV-1 RT using bio-layer interferometry  
253 (BLI). BLI allows for the real time measurement of binding affinities between ligands and  
254 analytes of varying size using single-use, fiber optical sensors. BLI measures association ( $k_{on}$ )  
255 and dissociation ( $k_{off}$ ) rates directly from full spectrum wavelength shifts associated with  
256 interference pattern changes derived from binding events at a sensors tip to determine binding  
257 affinities ( $K_D$ ).<sup>54</sup> Recombinant-wild type HIV-1 p66/p51 RT (NIH Aids Reagents) was  
258 immobilized via amine coupling onto BLI biosensors. **B#24**, selected other azaBINOLs, and  
259 control compounds (rilpivirine positive control, raltegravir negative control) were prepared in 1x  
260 kinetics buffer at multiple concentrations. Each compound was tested at multiple concentrations,

261 responses were globally fit using a 1:1 binding model, and these fits were used to calculate  $K_D$   
262 values. The binding curves obtained for **B#24** are shown in Figure 5. In good agreement with  
263 cell-based antiviral assays, **B#24** shows a concentration-dependent binding to HIV-1 RT. Control  
264 compound rilpivirine also showed concentration dependent binding curves while raltegravir, an  
265 HIV-1 integrase inhibitor showed no binding at any concentration tested as expected (SI Figure  
266 4). Although the acquired  $K_D$  of 38  $\mu$ M associated with **B#24** is higher than the  $IC_{50}$  in cell-based  
267 assays, it should be noted that the affinity value cannot be directly related to neutralization  
268 efficacy, as seen in many high-affinity, non-neutralizing HIV antibodies.<sup>55-57</sup> No binding was  
269 observed for the related azaBINOLs of interest from the compound library (SI Figure 7). In  
270 summary, the BLI binding data obtained reveals a striking correlation between the binding  
271 affinity of **B#24** towards its target HIV RT and its antiviral activity.

#### 272 4. Discussion and conclusion

273 RNase H inhibition of HIV-1 RT is an under explored and under-utilized mechanism of  
274 inhibition. The azaBINOL compounds reported here represent novel scaffolds that inhibit HIV  
275 via an underexplored allosteric mechanism with low toxicity and high specificity. In particular,  
276 the isopropyl ether derivative of 2'-deoxy-8-azaBINOL (**B#24**) exhibits with potent and specific  
277 antiviral activity against HIV RNase H. We utilized time-of-addition experiments and  
278 recombinant enzyme assays to show that **B#24** specifically inhibits RNase H. In addition, we  
279 used BLI to show that **B#24** binds to HIV RT via a 1:1 binding mechanism with a binding  
280 affinity ( $K_D$ ) of 38  $\mu$ M. Although a number of azaBINOL compounds within the screened library  
281 were found to have limited solubility in the cell-based assays as expected, aggregation and non-  
282 specific inhibition was tested thoroughly and can be dismissed for lead compound **B#24** (SI Fig  
283 6,7).

284 Clinically approved HIV-1 NNRTI's including nevirapine, efavirenz, and recently rilpivirine,  
285 exhibit antiviral activity against HIV-1 by allosterically inhibiting RT through hydrophobic  
286 interactions at the NNRTI binding site.<sup>24, 25, 58, 59</sup> Binding to the NNRTI binding site often results  
287 in combined effects in inhibiting DNA polymerase and RNase H activity through conformational  
288 shifts in the enzyme.<sup>60</sup> Only a few privileged structures like the acyl hydrazones,<sup>24</sup> vinyllogous  
289 ureas,<sup>48</sup> cHTC's,<sup>53</sup> and now **B#24** have been identified with potent HIV-1 inhibitory effects  
290 through specific RNase H inhibition.

291 We predict that the naphthyl moiety of the azaBINOL compounds may bind to a hydrophobic  
292 surface present on the RNase H domain of HIV-1 RT<sup>25</sup> while leaving the substituted quinoline  
293 space to further interact with the protein. In the case of the 2-deoxy-8,8'-diazabINOL derivatives  
294 (**B#57**, **B#58**) or the naphthol-type regioisomer of ether **B#24** (**B#59**), the antiviral activity is  
295 absent or significantly reduced likely due to the reduced hydrophobic surface and increased  
296 steric interactions, respectively. Ongoing research in our laboratory will explore if **B#24** truly  
297 binds allosterically to RNase H and if the binding affinity and HIV-1 neutralization can be  
298 enhanced by chemical modifications.

299 Future studies are planned to optimize the azaBINOL core structure to increase HIV-1  
300 activity by improving HIV-1 binding, solubility, and to reduce cytotoxicity. It is anticipated that  
301 the absolute configuration of the biaryl system will influence biological activity but to what  
302 extent remains an open question since a majority of the compounds evaluated herein were tested  
303 in racemic form only. Work is in progress to determine the configurational stability of  
304 compounds such as **B#24** and bioassays of these materials in enantioenriched form will be  
305 conducted should their racemization half-lives prove to be high enough for such an effort to be  
306 meaningful.

307 In summary, we discovered that an isopropyl ether derivative of an aza-analog of the  
308 archetypal axially chiral biaryl ligand BINOL, inhibits HIV-1 infection in vitro. Based on the  
309 identified RNase H inhibition, direct HIV-1 RT binding, and the known hydrophobic binding  
310 surfaces associated with allosteric inhibition,<sup>58</sup> we believe that **B#24** is a novel allosteric inhibitor  
311 of HIV-1 RT-RNase H activity. While biaryl compounds of natural origin have long been known  
312 to exhibit significant biological activity,<sup>14, 61</sup> this study suggests that further investigations of the  
313 bioactivity of artificial biaryls, designed purely with synthetic utility in mind, are warranted.

## 314 **5. Experimental Section**

### 315 **5.1 General experimental procedures.**

316 UV spectra, luminescence and absorbance readings were recorded on a BioTek Synergy HT  
317 plate reader. NMR spectra were acquired on Bruker Avance III 400 MHz, Bruker Avance III 500  
318 MHz, Bruker Avance III 700 MHz, and Bruker Ascend 800 MHz spectrometers, equipped with  
319 either a 5 mm TXI probe (500 MHz), a 5 mm BBO probe (400 MHz and 500 MHz), or a 5 mm  
320 TCI cryoprobe (700 MHz and 800 MHz), with the appropriate solvent signals used as an internal  
321 calibration standard [for CDCl<sub>3</sub>:  $\delta_{\text{H}}$  (CHCl<sub>3</sub>) = 7.26 ppm,  $\delta_{\text{C}}$  (CDCl<sub>3</sub>) = 77.2 ppm]. Numbers in  
322 parentheses following carbon atom chemical shifts refer to the number of attached hydrogen  
323 atoms as revealed by the DEPT spectral editing technique. Infra-red spectra were recorded on a  
324 Perkin Elmer Spectrum II FT-IR using a thin film between NaCl plates. Low (MS) and high  
325 resolution (HRMS) mass spectra were obtained using electrospray (ES) ionization on a Waters  
326 SYNAPT instrument interfaced with a Shimadzu LC20ad liquid chromatograph. Ion  
327 mass/charge (*m/z*) ratios are reported as values in atomic mass units. Preparative  
328 chromatographic separations were performed on silica gel 60 (35-75  $\mu\text{m}$ ) and reactions were

329 followed by TLC analysis using silica gel 60 plates (2-25  $\mu\text{m}$ ) with fluorescent indicator (254  
330 nm) and visualized by UV or phosphomolybdic acid (PMA).

### 331 **5.2 Materials.**

332 Non-commercially available BINOL and azaBINOL compounds tested were previously  
333 synthesized and characterized at Oregon State University. Preparation details and  
334 characterization data for previously undescribed compounds (**B#24**, **B#57**, **B#58**, **B#59**, and  
335 **B#60**) are given below. Unless otherwise stated, all solvents were purchased from ThermoFisher  
336 Scientific (Waltham, MA) and reagents for chemical synthesis were purchased from Sigma-  
337 Aldrich (Milwaukee, WI) and used as received. TZM-bl cells and the HIV-1 inhibitors  
338 raltegravir, efavirenz, and rilpivirine were obtained through the NIH Aids Reagent Program.<sup>62-67</sup>  
339 HEK 293T cells were a kind gift from Dr. Pастey Manoj (Oregon State University). HIV-1 viral  
340 expression plasmids (pSG3, pHxB2, and pYU2) were obtained as a generous gift from Carole  
341 Bewley (NIH, NIDDK). Dulbecco's modified eagle medium (DMEM) was purchased from VWR.  
342 PBS buffer was purchased from Gibco (ThermoFisher Scientific). Trypsin/EDTA (0.25%/2.21  
343 mM) and penicillin/streptomycin solutions were attained from Corning Life Sciences (Corning,  
344 NY). Fetal Bovine Serum (FBS) was obtained from Atlanta Biologicals (Flowery Branch, GA).  
345 QuantiLum Recombinant Luciferase and the BrightGlo Luciferase Assay System were acquired  
346 from Promega (Madison, WI). The HIV-1 inhibitor temsavir was acquired from ViiV Healthcare  
347 (Brentford, UK). All compounds received were tested for purity and identity via LCMS analysis  
348 before use.

### 349 **5.3 Synthesis of new compounds and characterization data.**

350 *Representative procedure for preparation of isopropyl ethers. 7-(Isopropoxy)-8-(naphth-*  
351 **1-yl)quinoline (B#24)**: A stirred solution of 7-hydroxy-8-(naphth-1-yl)quinoline (**4**, 20 mg,



352 0.074 mmol)<sup>26</sup> in reagent grade DMF (0.5 mL) at rt under Ar was treated with NaH (12 mg, 60  
353 wt.% in mineral oil, 0.30 mmol). Effervescence was observed. After stirring for 30 min, neat 2-  
354 bromopropane (0.030 mL, d = 1.31, 39 mg, 0.317 mmol) was added. The reaction mixture was  
355 then heated to 45 °C and stirring continued for 18 h. After this time, the mixture was allowed to  
356 cool to rt and partitioned between EtOAc (5 mL) and H<sub>2</sub>O (5 mL). The aqueous phase was  
357 extracted with EtOAc (5 mL) and the combined organic phases were washed with H<sub>2</sub>O (5 mL)  
358 and brine (5 mL), then dried (Na<sub>2</sub>SO<sub>4</sub>) and concentrated *in vacuo*. The residue was purified by  
359 column chromatography (SiO<sub>2</sub>, eluting with 15-30% EtOAc in hexanes) to afford ether **B#24** (20  
360 mg, 0.064 mmol, 86%) as a colorless oil: IR (neat) 2976, 2927, 1610, 1498, 1307, 1259, 1111,  
361 773 cm<sup>-1</sup>; <sup>1</sup>H NMR (400 MHz, CDCl<sub>3</sub>) δ 8.76 (1H, dd, *J* = 4.2, 1.8 Hz), 8.17 (1H, dd, *J* = 8.2,  
362 1.8 Hz), 7.92 (1H, dm, *J* = 8.3 Hz), 7.90 (2H, d, *J* = 9.0 Hz), 7.61 (1H, dd, *J* = 8.2, 7.0 Hz), 7.47  
363 (1H, d, *J* = 9.0 Hz), 7.45 (1H, dd, *J* = 7.0, 1.2 Hz), 7.42 (1H, ddd, *J* = 8.1, 6.7, 1.4 Hz), 7.31-7.21  
364 (3H, m), 4.42 (1H, septet, *J* = 6.1 Hz), 1.05 (3H, d, *J* = 6.1 Hz), 0.98 (3H, d, *J* = 6.1 Hz) ppm;  
365 <sup>13</sup>C NMR (175 MHz, CDCl<sub>3</sub>) δ 157.6 (0), 150.2 (1), 147.0 (0), 137.9 (0), 133.9 (0), 132.9 (0),  
366 129.1 (1), 128.9 (1), 128.5 (1), 128.3 (1), 126.2 (1), 125.8 (1), 125.6 (1), 125.5 (1), 124.1 (0),  
367 119.0 (1), 118.5 (1), 72.6 (1), 22.3 (3), 22.2 (3) ppm (aromatic C-atom signals not fully resolved,  
368 20 peaks observed for 22 unique C-atoms); MS (ES<sup>+</sup>) *m/z* 314 (M+H)<sup>+</sup>; HRMS (ES<sup>+</sup>) *m/z*  
369 314.1544 (calcd. for C<sub>22</sub>H<sub>20</sub>NO: 314.1545).

370 **7-(Isopropoxy)-8,8'-biquinolyl (B#57)**: 7-Hydroxy-8,8'-biquinolyl (**6**, 52 mg, 0.191  
371 mmol)<sup>29</sup> was converted into isopropyl ether **B#57** (46 mg, 0.146 mmol, 77%) by analogy to the  
372 synthesis of **B#24** given above. Data for **B#57**: colorless oil; IR (neat) 2925, 1658, 1596, 1496,  
373 1272, 1112, 1045, 829, 796 cm<sup>-1</sup>; <sup>1</sup>H NMR (400 MHz, CDCl<sub>3</sub>) δ 8.78 (1H, dd, *J* = 3.9, 1.8 Hz),  
374 8.72 (1H, dd, *J* = 4.2, 1.8 Hz), 8.21 (1H, dd, *J* = 8.3, 1.8 Hz), 8.14 (1H, dd, *J* = 8.2, 1.8 Hz), 7.90

375 (1H, dd, 7.2, 2.5 Hz), 7.88 (1H, d,  $J = 9.1$  Hz), 7.71-7.65 (2H, m), 7.47 (1H, d,  $J = 9.0$  Hz), 7.34  
376 (1H, dd,  $J = 8.3, 4.2$  Hz), 7.22 (1H, dd,  $J = 8.2, 4.2$  Hz), 4.46 (1H, septet,  $J = 6.1$  Hz), 1.06 (3H,  
377 d,  $J = 6.1$  Hz), 0.96 (3H, d,  $J = 6.1$  Hz) ppm;  $^{13}\text{C}$  NMR (100 MHz,  $\text{CDCl}_3$ )  $\delta$  156.6 (0), 150.7 (1),  
378 149.9 (1), 148.8 (0), 147.8 (0), 136.4 (0), 136.3 (1), 136.0 (1), 132.2 (1), 128.8 (1), 128.6 (0),  
379 127.7 (1), 127.3 (0), 126.3 (1), 124.2 (0), 120.7 (1), 119.0 (1), 118.2 (1), 72.5 (1), 22.5 (3), 22.3  
380 (3) ppm; MS (ES+)  $m/z$  315 (M+H) $^+$ ; HRMS (ES+)  $m/z$  315.1502 (calcd. for  $\text{C}_{21}\text{H}_{19}\text{N}_2\text{O}$ :  
381 315.1497).

382 **2-(Isopropoxy)-1-(quinol-8-yl)naphthalene (B#59)**: 2-Hydroxy-1-(quinol-8-  
383 yl)naphthalene (**5**, 75 mg, 0.276 mmol)<sup>26</sup> was converted into isopropyl ether **B#59** (66 mg, 0.211  
384 mmol, 76%) by analogy to the synthesis of **B#24** given above. Data for **B#59**: colorless oil; IR  
385 (neat) 2976, 2927, 1716, 1593, 1496, 1371, 1235, 798, 750  $\text{cm}^{-1}$ ;  $^1\text{H}$  NMR (400 MHz,  $\text{CDCl}_3$ )  $\delta$   
386 8.80 (1H, dd,  $J = 4.2, 1.8$  Hz), 8.24 (1H, dd,  $J = 8.3, 1.8$  Hz), 7.94-7.88 (2H, m), 7.84 (1H, dm,  $J$   
387 = 8.1 Hz), 7.68-7.64 (2H, m), 7.41 (1H, d,  $J = 9.0$  Hz), 7.37 (1H, dd,  $J = 8.3, 4.2$  Hz), 7.31 (1H,  
388 ddd,  $J = 8.0, 6.6, 1.4$  Hz), 7.21 (1H, ddd,  $J = 8.5, 6.6, 1.3$  Hz), 7.15 (1H, dm,  $J = 8.5$  Hz), 4.36  
389 (1H, septet,  $J = 6.1$  Hz), 1.05 (3H, d,  $J = 6.1$  Hz), 0.89 (3H, d,  $J = 6.1$  Hz) ppm;  $^{13}\text{C}$  NMR (175  
390 MHz,  $\text{CDCl}_3$ )  $\delta$  153.5 (0), 150.3 (1), 147.8 (0), 136.9 (0), 136.3 (1), 134.4 (0), 132.5 (1), 129.6  
391 (0), 129.4 (1), 128.6 (0), 128.1 (1), 127.7 (1), 126.3 (1), 126.1 (1), 126.0 (0), 125.9 (1), 123.7 (1),  
392 121.0 (1), 118.5 (1), 72.9 (1), 22.6 (3), 22.4 (3) ppm; MS (ES+)  $m/z$  314 (M+H) $^+$ ; HRMS (ES+)  
393  $m/z$  314.1546 (calcd. for  $\text{C}_{22}\text{H}_{20}\text{NO}$ : 314.1545).

394 *Representative procedure for preparation of carbamates. 7-[(Diethylamino)carbonyloxy]-*  
395 **8,8'-biquinolyl (B#58)**: A stirred solution of 7-hydroxy-8,8'-biquinolyl (**6**, 43 mg, 0.158  
396 mmol)<sup>29</sup> in pyridine (1.0 mL) at rt under Ar was treated with neat diethylcarbonyl chloride  
397 (0.080 mL,  $d = 1.07$ , 86 mg, 0.632 mmol). The resulting solution was heated to 100 °C and

398 stirred for 24 h. After this time, the mixture was allowed to cool to rt and partitioned between  
399 EtOAc (10 mL), H<sub>2</sub>O (15 mL) and sat. aq. NaHCO<sub>3</sub> (5 mL). The aqueous phase was extracted  
400 with EtOAc (10 mL) and the combined organic phases washed with H<sub>2</sub>O (5 mL) and brine (5  
401 mL), then dried (Na<sub>2</sub>SO<sub>4</sub>) and concentrated *in vacuo*. The residue was purified by column  
402 chromatography (SiO<sub>2</sub>, eluting with 3% MeOH in CH<sub>2</sub>Cl<sub>2</sub>) to afford carbamate **B#58** (45 mg,  
403 0.121 mmol, 77%) as a colorless oil: IR (neat) 2930, 1715, 1594, 1417, 1263, 1208, 1157, 796  
404 cm<sup>-1</sup>; <sup>1</sup>H NMR (400 MHz, CDCl<sub>3</sub>) δ 8.81 (1H, dd, *J* = 4.3, 1.7 Hz), 8.79 (1H, dd, *J* = 4.2, 1.7  
405 Hz), 8.22 (1H, dd, *J* = 6.6, 1.7 Hz), 8.20 (1H, dd, *J* = 6.5, 1.7 Hz), 7.94 (1H, d, *J* = 8.9 Hz), 7.90  
406 (1H, dd, *J* = 8.1, 1.3 Hz), 7.76 (1H, dd, *J* = 7.1, 1.4 Hz), 7.68 (1H, dm, *J* = 7.3 Hz), 7.64 (1H, d, *J*  
407 = 8.8 Hz), 7.35 (1H, t, *J* = 4.4 Hz), 7.33 (1H, d, *J* = 4.4 Hz), 3.17-3.06 (2H, m), 2.68 (1H, dq, *J* =  
408 14.2, 7.1 Hz), 2.49 (1H, dq, *J* = 14.2, 7.0 Hz), 0.95 (3H, t, *J* = 7.0 Hz), 0.32 (3H, t, *J* = 7.0 Hz)  
409 ppm; <sup>13</sup>C NMR (100 MHz, CDCl<sub>3</sub>) δ 153.8 (0), 150.7 (1), 150.3 (1), 150.1 (0), 148.4 (0), 147.5  
410 (0), 136.2 (1), 136.2 (1), 135.0 (0), 132.4 (1), 130.4 (0), 128.6 (0), 128.4 (1), 128.1 (1), 126.6 (0),  
411 126.3 (1), 123.4 (1), 120.9 (1), 120.4 (1), 41.9 (2), 41.2 (2), 13.3 (3), 13.2 (3) ppm; MS (ES+)  
412 *m/z* 372 (M+H)<sup>+</sup>; HRMS (ES+) *m/z* 372.1716 (calcd. for C<sub>23</sub>H<sub>21</sub>N<sub>3</sub>O<sub>2</sub>: 372.1712).

413 **2-[(Diethylamino)oxycarbonyl]-1-(quinol-8-yl)naphthalene (B#60)**: 2-Hydroxy-1-(quinol-  
414 8-yl)naphthalene (**5**, 50 mg, 0.184 mmol)<sup>26</sup> was converted into carbamate **B#60** (59 mg, 0.159  
415 mmol, 86%) by analogy to the synthesis of **B#58** given above. Data for **B#60**: colorless oil; IR  
416 (neat) 2973, 2931, 1713, 1419, 1269, 1213, 1159, 982, 799, 750 cm<sup>-1</sup>; <sup>1</sup>H NMR (400 MHz,  
417 CDCl<sub>3</sub>) δ 8.83 (1H, dd, *J* = 4.2, 1.8 Hz), 8.23 (1H, dd, *J* = 8.3, 1.8 Hz), 7.96 (1H, d, *J* = 8.9 Hz),  
418 7.92 (1H, dd, *J* = 8.1, 1.5 Hz), 7.91 (1H, dm, *J* = 8.2 Hz), 7.74 (1H, dd, *J* = 7.1, 1.5 Hz), 7.65  
419 (1H, dd, *J* = 8.1, 7.2 Hz), 7.52 (1H, d, *J* = 8.9 Hz), 7.42 (1H, ddd, *J* = 8.1, 6.3, 1.6 Hz), 7.39 (1H,  
420 dd, *J* = 8.2, 4.2 Hz), 7.33-7.24 (2H, m), 3.15-3.08 (2H, m), 2.74 (1H, dq, *J* = 13.9, 6.9 Hz), 2.53

421 (1H, dq,  $J = 14.2, 7.3$  Hz), 0.94 (3H, t,  $J = 7.0$  Hz), 0.32 (3H, t,  $J = 6.9$  Hz) ppm;  $^{13}\text{C}$  NMR (100  
422 MHz,  $\text{CDCl}_3$ )  $\delta$  154.2 (0), 150.4 (1), 147.2 (2C, 0), 136.7 (1), 135.4 (0), 134.0 (0), 132.6 (1),  
423 131.8 (0), 129.2 (1), 128.6 (2C, 0), 128.3 (1), 128.1 (1), 126.5 (1), 126.3 (1), 126.2 (1), 125.1 (1),  
424 122.5 (1), 121.2 (1), 42.0 (2), 41.3 (2), 13.3 (2C, 3) ppm; MS (ES+)  $m/z$  371 (M+H) $^+$ ; HRMS  
425 (ES+)  $m/z$  371.1761 (calcd. for  $\text{C}_{24}\text{H}_{23}\text{N}_2\text{O}_2$ : 371.1760).

#### 426 **5.4 Cell culture.**

427 TZM-bl and HEK 293T cells were grown in DMEM supplemented with 10% (v/v) FBS,  
428 penicillin (100 units/mL), and streptomycin (100  $\mu\text{g}/\text{mL}$ ). Cells were maintained in a humidified  
429 incubator at 37°C with 5%  $\text{CO}_2$ . The passage number of cells used in experiments never  
430 exceeded 20 passages. All cell lines were tested mycoplasma-negative by real-time PCR  
431 (MycoSolutions mycoplasma detection kit, Akron Biotech, Boca Raton, FL).

#### 432 **5.5 Pseudovirus production.**

433 HIV-1 pseudotyped viruses were prepared as previously described.<sup>68</sup> Briefly, HEK 293T  
434 cells were transfected with an envelope expression plasmid (pHxB2, pYU2, or p89.6) and an  
435 envelope deficient HIV-1 backbone vector (pSG3 $_{\Delta\text{env}}$ ) using XtremeGENE HP DNA  
436 Transfection Reagent (Roche). After 24 hours of incubation at 37°C and 5%  $\text{CO}_2$ , the growth  
437 media was replaced with fresh media followed by an additional 24 hours of incubation. Cellular  
438 supernatant was collected and passed through a 0.45  $\mu\text{m}$  filter to give pseudoviral stock. 1 mL  
439 pseudoviral aliquots were stored at -80°C until further use in neutralization assays. Viral strength  
440 was determined through TCID<sub>50</sub> calculations. TZM-bl cells were plated at 9000 cells per well in  
441 white 96 well plates (Greiner Bio-One) and incubated at 37 C, 5%  $\text{CO}_2$  for 24 hours. HIV-1  
442 pseudoviruses were added over a two-fold dilution series to wells. At 48 hours-post infection,  
443 cells were lysed and BrighGlo luciferase substrate (Promega) added. Luminescence reading were

444 immediately recorded and the TCID<sub>50</sub> value calculated as 50% of the maximum light output  
445 based on control wells.

#### 446 **5.6 HIV-1 pseudovirus single-round infectivity assay.**

447 Viral infection rates of HIV-1 pseudoviruses in the presence of inhibitors was measured  
448 through HIV-1 pseudoviral tat-induced luciferase production in TZM-bl cells as described  
449 previously.<sup>68</sup> TZM-bl cells were plated at 9000 cells/well into 96 well plates (excluding outer  
450 wells to avoid edge effects) followed by overnight incubation at 37°C, 5% CO<sub>2</sub>. Inhibitors and  
451 pseudoviral particles at a final concentration of 1x (based on TCID<sub>50</sub> measurements) were  
452 incubated together for 20 min prior to transfer to adherent TZM-bl cells followed by 48 hours  
453 incubation at 37°C, 5% CO<sub>2</sub>. Viral infection was quantified based on luminescent readings taken  
454 immediately after the addition of BrighGlo luciferin substrate to infected cells in lysis buffer and  
455 relative infectivity rates calculated based on infectious and noninfectious vehicle control wells  
456 (1% DMSO). Antiviral IC<sub>50</sub> values were calculated from compound dilution series ran in  
457 triplicate.

#### 458 **5.7 HIV Full virus Screening (EASY-HIT).**

459 The EASY-HIT assay<sup>35</sup> is based on HIV-1 susceptible reporter cells (LC5-RIC) that contain  
460 a stably integrated fluorescent reporter gene that is activated upon successful HIV-1 infection  
461 and expression of the early viral protein Rev and Tat. Briefly, LC5-RIC cells were seeded into  
462 black 96-well plates at a density of 10,000 cells per well 24 hours prior to infection. Compounds  
463 stocks dissolved at 20 mM in DMSO were screened at multiple concentrations from 0.1 to 200  
464 μM at a final DMSO concentration of 1% to establish IC<sub>50</sub> curves. After compound addition,  
465 LC5-RIC cells were infected by adding HIV-1 inoculum at an MOI of 0.5 to each well of the  
466 plate. Cells were incubated at 37°C, 5% CO<sub>2</sub> for 48 hours after infection and then measured for

467 reporter expression. Reporter expression was determined by measuring the total fluorescent  
468 signal intensity of each well using a fluorescence microplate reader at an excitation filter  
469 wavelength of 552 nm and an emission filter wavelength of 596 nm.

## 470 **5.8 Cell viability assays.**

471 Cell viability of TZM-bl cells was determined by monitoring mitochondrial reductase  
472 activity from the reduction of the tetrazolium salt MTT by metabolically active cells.<sup>69</sup> TZM-bl  
473 cells were plated into 96 well plates (Greiner Bio-One) followed by overnight incubation at  
474 37°C, 5% CO<sub>2</sub>. Compounds were added to wells with a final DMSO concentration of 1%  
475 followed by an additional 48 hours incubation. After the designated incubation time, MTT  
476 reagent (5mg/mL in 1x PBS) was added to each well to a final concentration of 0.5 mg/mL.  
477 MTT containing plates were incubated for an additional 3 hours after which the media was  
478 removed, and the reduced purple formazan product dissolved in 50 µL DMSO. Absorbance was  
479 measured at 550 nm. Metabolic activity of vehicle-treated cells (1% DMSO) was defined as  
480 100% cell growth. Cell viability of LC5-RIC cultures exposed to HIV inoculum and test  
481 compounds was determined by performing a CellTiter-Blue® cell viability assay (Promega) and  
482 monitoring the ability of metabolically active cells to convert the redox dye resazurin into the  
483 fluorescent product resorufin. LC5-RIC cells were plated into black 96 well plates (Greiner Bio-  
484 One) followed by overnight incubation at 37°C, 5% CO<sub>2</sub>. Compounds stocks dissolved at 20 mM  
485 in DMSO were screened at multiple concentrations from 0.1 to 200 µM at a final DMSO  
486 concentration of 1% followed by an additional 48 hours incubation. After the designated  
487 incubation time, CTB reagent (1:5 in cell culture medium) was added to each well. CTB  
488 containing plates were incubated for an additional hour after which fluorescence signal of

489 resazurin was measured using a fluorescence microplate reader at an excitation filter wavelength  
490 of 550 nm and an emission filter wavelength of 600 nm.

#### 491 **5.9 Time-of-addition assay.**

492 To gain a further understanding of the mechanism of action of the antiviral azaBINOL  
493 compound **B#24**, a time-of-addition experiment was employed utilizing single-round HIV-1  
494 pseudo particles.<sup>70, 71</sup> TZM-bl cells were plated into 96 well plates (Greiner Bio-One) followed  
495 by overnight incubation at 37°C and 5% CO<sub>2</sub>. After 24 hours, plated TZM-bl cell were infected  
496 with HIV-1<sub>YU2</sub> pseudovirus. **B#24** (60 μM), temsavir (40 nM), efavirenz (40 nM), and raltegravir  
497 (1 μM) were added to separate wells at the initial viral inoculation time or at set points post-  
498 infection (up to 12 hours post-infection). Cells, virus, and inhibitor were incubated for an  
499 additional 48 hours followed by quantification of luciferase production to assess viral infection  
500 rates. The antiretroviral drug controls chosen (temsavir, efavirenz, raltegravir) reflect inhibition  
501 of HIV-1 at different stages of the viral lifecycle (entry/fusion, reverse transcription, and  
502 integration, respectively) allowing for a mechanistic comparison to the unknown antiviral  
503 compound **B#24**.

#### 504 **5.10 HIV-1 integrase enzyme assay.**

505 Inhibition of HIV-1 integrase was assessed using an HIV-1 integrase assay kit (XpressBio  
506 Life Science Products) according to the manufacturer's instructions. IC<sub>50</sub> values were determined  
507 through a two-fold dilution series run in triplicate. The normalized percent integrase inhibition  
508 was determined using positive and negative control references with a set amount of vehicle  
509 solvent (1% DMSO).

#### 510 **5.11 HIV-1 reverse transcriptase enzyme assay.**

511 Antiviral azaBINOL **B#24** was assessed for inhibition of HIV-1 reverse transcriptase using a  
512 commercially available colorimetric reverse transcriptase assay kit (Roche) according to the  
513 manufacturer's instructions. IC<sub>50</sub> values were determined through a dilution series run in  
514 triplicate. Normalized percentages of inhibitory activity were calculated using positive and  
515 negative control wells with a set amount of vehicle solvent (10% DMSO).

### 516 **5.12 Polymerase-Independent RNase H assay.**

517 A FRET based assay to assess RNase H inhibition of HIV-1 RT was used as previously  
518 described.<sup>40</sup> In a 100 µL reaction containing 50 mM Tris HCl at pH 7.8, 5.8 M MgCl<sub>2</sub>, 1 M  
519 dithiothreitol (DTT), 80 mM KCl, 2 nM HIV-1 RT (NIH Aids Reagent, cat#3555), and 0.25 µM  
520 annealed RNA/DNA hybrid (5'-GAU CUG AGC CUG GGA GCU-Fluorescein-3'; 5'-Dabcyl-  
521 AGC TCC CAG GCT CAG ATC-3'; Metabion, Germany) was incubated at 37°C for 1 hour.  
522 Enzymatic activity was quenched with the addition of 50 µL of ethylenediaminetetraacetic acid  
523 (EDTA; 0.5 M, pH 8.0) and fluorescence read using a Biotek plate reader at 490/528 nm  
524 excitation/emission wavelength. Data was analyzed by subtracting the value of a vehicle blank  
525 (1% DMSO) and reporting inhibitor as a percentage of the control.

### 526 **5.13 Bio-layer interferometry binding analysis.**

527 Binding of compounds to HIV-1 reverse transcriptase was detected and monitored in real  
528 time using a FortéBio Octet Red 96 BioLayer Interferometer. Recombinant wildtype HIV-1 RT  
529 (NIH Aids Reagent, cat# 3555) was immobilized on amine reactive sensors (AR2G) at 25 µg/mL  
530 for 1600 seconds in 50 mM acetate buffer at a pH of 7. Compounds at 20 mM in DMSO were  
531 diluted to final concentrations in black 96 well plates (Greiner Bio-One) at a final consistent  
532 DMSO concentration of 5% in 1x kinetic buffer (PBS pH 7.4, 0.02% Tween-20, 0.1% albumin,  
533 and 0.05% sodium azide, FortéBio). Binding affinity ( $K_D$ ) was characterized through the analysis



534 of association and dissociation curves at multiple concentrations. All samples were tested in  
535 duplicate. Rilpivirine was used as a positive binding control, raltegravir as a negative control.  
536 Effects from non-specific binding were removed using double referencing. Residual baseline  
537 drift was calculated by fitting the response during baseline periods to an exponential decay and  
538 then subtracting this drift. The resulting response curves were globally fit to a 1:1 Langmuir  
539 model.<sup>72</sup> All fits were performed using a constrained, non-linear least squares minimization  
540 (MATLAB R2018a, lsqnonlin function implementing the trust region reflective algorithm).  
541 Constraints on parameters were used to guide convergence away from non-physical parameter  
542 values, but all constraints were inactive at the converged optimum. A parametric bootstrap  
543 analysis was used to compute a 95% confidence interval for the computed  $K_D$  values, using a  
544 normally-distributed error with variance estimated from the sum of squared residuals of the  
545 model fit (MATLAB R2018a, 100 iterations). Random noise in response curves was filtered  
546 prior to plotting using a smoothing spline (MATLAB R2018a, spaps function).

#### 547 **5.14 Bivalent metal binding assay.**

548 Testing for complexation of **B#24** with  $Mg^{2+}$  ions was carried out following previous  
549 protocols with adjustments.<sup>50</sup> In brief, a 1 M stock solution of  $MgCl_2$  and a 1 M solution of **B#24**  
550 were prepared in 1:1 ethanol/acetonitrile mixtures. **B#24** was diluted to 100  $\mu M$  and UV  
551 absorbance readings recorded using a BioTek synergy plate reader from 200 – 400 nm. 10  $\mu L$   
552 additions of a 500 mM  $Mg^{2+}$  solution containing 100  $\mu M$  **B#24** (to keep compound concentration  
553 consistent) was added stepwise followed by absorbance readings between each addition. The  
554 concentration of  $Mg^{2+}$  was raised with each addition from 0.5 mM to 120 mM. Alignment,  
555 reference subtraction of blanks, and plotting were done on raw data using Microsoft Excel.

#### 556 **5.15 Luminescence inhibition assays.**

557 To determine if **B#24** was capable of non-specifically inhibiting luciferase activity in the  
558 HIV-1 pseudotyped assay, we implemented a cell-free assay with purified recombinant luciferase  
559 (Promega) and luciferin (BrightGlo Luciferase Assay System; Promega) following a previous  
560 protocol.<sup>38</sup> Protein and reagents were prepared and stored according to manufacturer's  
561 instructions. Preliminary experiments established the concentration of luciferin to be used in the  
562 assay in order to closely mimic the protein signal in single-round infectivity assay and give  
563 maximal sensitivity in luminescence readings. Reactions were carried out in white 96 well-plates  
564 (Gibco; ThermoFisher Scientific) by combining compounds with 0.5 µg/mL recombinant  
565 luciferase in 1x PBS buffer and 1 mg/mL BSA (VWR). Reactions were initiated by the addition  
566 of 30 µL luciferin substrate to wells. Luminescence readings were immediately recorded and  
567 normalized using appropriate controls with vehicle solvent (1% DMSO). The compounds  
568 Luciferase Inhibitor I (VWR) and raltegravir (NIH Aids Reagent Program) were used as positive  
569 and negative controls respectively.

#### 570 **5.16 Compound aggregation assessment.**

571 We observed precipitation of some azaBINOL compounds at concentrations higher than 200  
572 µM in cell media with 1% DMSO. To assess if the antiviral activity from the active azaBINOL  
573 compound **B#24** could be due to non-specific aggregation effects, an <sup>1</sup>H-NMR assay was  
574 implemented to characterize compound behavior in aqueous conditions as described  
575 previously.<sup>39</sup> Briefly, **B#24** was solubilized in DMSO-D<sub>6</sub> (MilliporeSigma; Burlington, MA) to a  
576 concentration of 20 mM. Serial dilution in 50 mM sodium phosphate at pH 6.8 in 100% D<sub>2</sub>O  
577 (MilliporeSigma; Burlington, MA) yielded five samples ranging in concentration from 200 µM  
578 to 12 µM. <sup>1</sup>H-NMR spectra of each sample was obtained over 64 scans on a Bruker Ascend 800

579 MHz spectrometer equipped with a 5mm TCI cryoprobe. Data was analyzed and plotted using  
580 Bruker TopSpin software.

581

## 582 **Author contributions**

583 All compounds were synthesized and characterized by SB, SMS, and PRB. All cell-based assays  
584 were done by RO, GN, and AH. Data analysis was performed by RO, AH, JS, RBW, PRB and  
585 SL. The manuscript was written through contributions of all authors and all authors have given  
586 approval to the final version of the manuscript.

587

## 588 **Acknowledgments**

589 This work was supported by OSU start-up funds (SL). Envelope plasmids (pHxB2, pYU2,  
590 p89.6) were a kind gift from Carole Bewley (NIH, NIDDK). Temsavir was kindly provided by  
591 Bristol Myers Squibb. This compound has subsequently been by acquired by ViiV Healthcare.  
592 The following reagents were obtained through the NIH AIDS Reagent Program, Division of  
593 AIDS, NIAID, NIH: TZM-bl cells (Cat# 8129) from Dr. John C. Kappes, Dr. Xiaoyun Wu and  
594 Tranzyme Inc. Raltegravir (Cat # 11680) from Merck & Company, Inc. Efavirenz (Cat # 4624)  
595 from the Division of AIDS, NIAID. Rilpivirine (Cat # 12147) from Tibotec Pharmaceuticals,  
596 Inc. HIV-1 RT (Cat #3555) from Dr. Stuart Le Grice and Dr. Jennifer T. Miller. We  
597 acknowledge the support of the Oregon State University NMR facility funded in part by the  
598 National Institutes of Health, HEI Grant 1S110OD018518, and by the M. J. Murdock Charitable  
599 Trust grant #2014162.

600

## 601 **Supplementary data**

602 Supplementary data (additional NMR data and figures illustrating compound library antiviral  
603 screening, protein assay results, BLI control data, and assessment of nonspecific inhibition)  
604 associated with this article can be found in the online version.

605

606 **References**

- 607 (1) *HIV/AIDS factsheet*; World Health Organization:  
608 <http://www.who.int/mediacentre/factsheets/fs360/en/> 2018.
- 609 (2) Fauci, A. S. An HIV vaccine is essential for ending the HIV/AIDS pandemic. *Jama* **2017**,  
610 318, 1535-1536.
- 611 (3) Pham, Q. D.; Wilson, D. P.; Law, M. G.; Kelleher, A. D.; Zhang, L. Global burden of  
612 transmitted HIV drug resistance and HIV-exposure categories: a systematic review and meta-  
613 analysis. *AIDS* **2014**, 28, 2751-2762.
- 614 (4) Tang, M. W.; Shafer, R. W. HIV-1 antiretroviral resistance. *Drugs* **2012**, 72, e1-e25.
- 615 (5) Miller, C.; Crain, J.; Tran, B.; Patel, N. Rilpivirine: a new addition to the anti-HIV-1  
616 armamentarium. *Drugs Today (Barc)* **2011**, 47, 5-15.
- 617 (6) Murphy, R. L.; Montaner, J. Drug Evaluations Anti-infectives: Nevirapine: A review of its  
618 development, pharmacological profile and potential for clinical use. *Expert Opin. Investig.*  
619 *Drugs*. **1996**, 5, 1183-1199.
- 620 (7) De Clercq, E.; Li, G. Approved antiviral drugs over the past 50 years. *Clin. Microbiol. Rev.*  
621 **2016**, 29, 695-747.
- 622 (8) Corona, A.; Masaoka, T.; Tocco, G.; Tramontano, E.; Le Grice, S. F. Active site and  
623 allosteric inhibitors of the ribonuclease H activity of HIV reverse transcriptase. *Future Med.*  
624 *Chem.* **2013**, 5, 2127-2139.
- 625 (9) Wang, X.; Gao, P.; Menendez-Arias, L.; Liu, X.; Zhan, P. Update on recent developments  
626 in small molecular HIV-1 RNase H inhibitors (2013-2016): opportunities and challenges. *Curr.*  
627 *Med. Chem* **2018**, 25, 1682-1702.
- 628 (10) de Béthune, M.-P. Non-nucleoside reverse transcriptase inhibitors (NNRTIs), their  
629 discovery, development, and use in the treatment of HIV-1 infection: a review of the last 20  
630 years (1989–2009). *Antivir. Res.* **2010**, 85, 75-90.
- 631 (11) Beilhartz, G. L.; Götte, M. HIV-1 ribonuclease H: structure, catalytic mechanism and  
632 inhibitors. *Viruses* **2010**, 2, 900-926.
- 633 (12) Brunel, J. M. BINOL: a versatile chiral reagent. *Chem. Rev.* **2005**, 105, 857-897.
- 634 (13) Aldemir, H.; Richarz, R.; Gulder, T. A. The biocatalytic repertoire of natural biaryl  
635 formation. *Angew. Chem. Int. Ed. Engl.* **2014**, 53, 8286-8293.
- 636 (14) Bringmann, G.; Gulder, T.; Gulder, T. A. M.; Breuning, M. Atroposelective total synthesis  
637 of axially chiral biaryl natural products. *Chem. Rev.* **2011**, 111, 563-639.
- 638 (15) Boyd, M. R.; Hallock, Y. F.; Cardellina, J. H.; Manfredi, K. P.; Blunt, J. W.; McMahon, J.  
639 B.; Buckheit Jr, R. W.; Bringmann, G.; Schäffer, M.; Cragg, G. M. Anti-HIV michellamines  
640 from *Ancistrocladus korupensis*. *J. Med. Chem.* **1994**, 37, 1740-1745.
- 641 (16) Hallock, Y. F.; Manfredi, K. P.; Dai, J.-R.; Cardellina, J. H.; Gulakowski, R. J.; McMahon,  
642 J. B.; Schäffer, M.; Stahl, M.; Gulden, K.-P.; Bringmann, G. Michellamines D– F, new HIV-  
643 inhibitory dimeric naphthylisoquinoline alkaloids, and korupensamine E, a new antimalarial  
644 monomer, from *Ancistrocladus korupensis*. *J. Nat. Prod.* **1997**, 60, 677-683.
- 645 (17) Manfredi, K. P.; Blunt, J. W.; Cardellina, J. H.; McMahon, J. B.; Pannell, L. L.; Cragg, G.  
646 M.; Boyd, M. R. Novel alkaloids from the tropical plant *Ancistrocladus abbreviatus* inhibit cell  
647 killing by HIV-1 and HIV-2. *J. Med. Chem.* **1991**, 34, 3402-3405.

- 648 (18) Bringmann, G.; Steinert, C.; Feineis, D.; Mudogo, V.; Betzin, J.; Scheller, C. HIV-  
649 inhibitory michellamine-type dimeric naphthylisoquinoline alkaloids from the Central African  
650 liana *Ancistrocladus congolensis*. *Phytochemistry* **2016**, 128, 71-81.
- 651 (19) McMahan, J. B.; Currens, M. J.; Gulakowski, R. J.; Buckheit, R.; Lackman-Smith, C.;  
652 Hallock, Y. F.; Boyd, M. R. Michellamine B, a novel plant alkaloid, inhibits human  
653 immunodeficiency virus-induced cell killing by at least two distinct mechanisms. *Antimicrob.*  
654 *Agents Chemother.* **1995**, 39, 484-488.
- 655 (20) Bringmann, G.; Holenz, J.; Wiesen, B.; Nugroho, B. W.; Proksch, P. Diconcophylline A as  
656 a growth-retarding agent against the herbivorous insect *Spodoptera littoralis*: structure-activity  
657 relationships. *J. Nat. Prod.* **1997**, 60, 342-437.
- 658 (21) Teissier, E.; Zandomenighi, G.; Loquet, A.; Lavillette, D.; Lavergne, J. P.; Montserret, R.;  
659 Cosset, F. L.; Bockmann, A.; Meier, B. H.; Penin, F.; Pecheur, E. I. Mechanism of inhibition of  
660 enveloped virus membrane fusion by the antiviral drug arbidol. *PLoS One* **2011**, 6, e15874.
- 661 (22) Emileh, A.; Tuzer, F.; Yeh, H.; Umashankara, M.; Moreira, D. R.; Lalonde, J. M.; Bewley,  
662 C. A.; Abrams, C. F.; Chaiken, I. M. A model of peptide triazole entry inhibitor binding to HIV-  
663 1 gp120 and the mechanism of bridging sheet disruption. *Biochemistry* **2013**, 52, 2245-2261.
- 664 (23) Wolf, M. C.; Freiberg, A. N.; Zhang, T.; Akyol-Ataman, Z.; Grock, A.; Hong, P. W.; Li,  
665 J.; Watson, N. F.; Fang, A. Q.; Aguilar, H. C.; Porotto, M.; Honko, A. N.; Damoiseaux, R.;  
666 Miller, J. P.; Woodson, S. E.; Chantasirivisal, S.; Fontanes, V.; Negrete, O. A.; Krogstad, P.;  
667 Dasgupta, A.; Moscona, A.; Hensley, L. E.; Whelan, S. P.; Faull, K. F.; Holbrook, M. R.; Jung,  
668 M. E.; Lee, B. A broad-spectrum antiviral targeting entry of enveloped viruses. *Proc. Natl. Acad.*  
669 *Sci. U.S.A.* **2010**, 107, 3157-3162.
- 670 (24) Himmel, D. M.; Sarafianos, S. G.; Dharmasena, S.; Hossain, M. M.; McCoy-Simandle, K.;  
671 Ilina, T.; Clark Jr, A. D.; Knight, J. L.; Julias, J. G.; Clark, P. K. HIV-1 reverse transcriptase  
672 structure with RNase H inhibitor dihydroxy benzoyl naphthyl hydrazone bound at a novel site.  
673 *ACS Chem. Biol.* **2006**, 1, 702-712.
- 674 (25) Kankanala, J.; Kirby, K. A.; Liu, F.; Miller, L.; Nagy, E.; Wilson, D. J.; Parniak, M. A.;  
675 Sarafianos, S. G.; Wang, Z. Design, synthesis, and biological evaluations of  
676 hydroxypyridonecarboxylic acids as inhibitors of HIV reverse transcriptase associated RNase H.  
677 *J. Med. Chem.* **2016**, 59, 5051-5062.
- 678 (26) Banerjee, S.; Riggs, B. E.; Zakharov, L. N.; Blakemore, P. R. Synthesis, properties, and  
679 enantiomerization behavior of axially chiral phenolic derivatives of 8-(naphth-1-yl)quinoline and  
680 comparison to 7,7'-dihydroxy-8,8'-biquinolyl and 1,1'-bi-2-naphthol. *Synthesis* **2015**, 47, 4008-  
681 4016.
- 682 (27) Blakemore, P. R.; Kilner, C.; Milicevic, S. D. Harnessing anionic rearrangements on the  
683 benzenoid ring of quinoline for the synthesis of 6,6'-disubstituted 7,7'-dihydroxy-8,8'-  
684 biquinolyls. *J. Org. Chem.* **2005**, 70, 373-376.
- 685 (28) Blakemore, P. R.; Milicevic, S. D.; Zakharov, L. N. Enzymatic resolution of 7,7'-  
686 dihydroxy-8,8'-biquinolyl dipentanoate and its conversion to 2,2'-Di-tert-butyl-7,7'-dihydroxy-  
687 8,8'-biquinolyl. *J. Org. Chem.* **2007**, 72, 9368-9371.
- 688 (29) Wang, C.; Flanagan, D. M.; Zakharov, L. N.; Blakemore, P. R. Synthesis of 7,7'-  
689 dihydroxy-8,8'-biquinolyl (azaBINOL) via Pd-catalyzed directed double C-H functionalization  
690 of 8,8'-biquinolyl: emergence of an atropis from a tropis State. *Org. Lett.* **2011**, 13, 4024-4027.

- 691 (30) Blakemore, P. R.; Kilner, C.; Milicevic, S. D. Resolution, enantiomerization kinetics, and  
692 chiroptical properties of 7,7'-dihydroxy-8,8'-biquinolyl. *J. Org. Chem.* **2006**, 71, 8212-8218.
- 693 (31) Blakemore, P. R.; Milicevic, S. D.; Perera, H.; Shvarev, A.; Zakharov, L. N. Determination  
694 of pKa values for diether derivatives of 7,7'-dihydroxy-8,8'-biquinolyl: dependence of basicity on  
695 interannular dihedral angle. *Synthesis* **2008**, 2271-2277.
- 696 (32) Sephton, S. M.; Wang, C.; Zakharov, L. N.; Blakemore, P. R. Silylcyanation of aldehydes,  
697 ketones, and imines catalyzed by a 6,6'-bis-sulfonamide derivative of 7,7'-dihydroxy-8,8'-  
698 biquinolyl (azaBINOL). *Eur. J. Org. Chem.* **2012**, 2012, 3249-3260.
- 699 (33) Wu, Z.; Wang, C.; Zakharov, L. N.; Blakemore, P. R. Enantioselective synthesis of biaryl  
700 compounds via Suzuki-Miyaura cross-coupling using a palladium complex of 7'-butoxy-7-  
701 (diphenylphosphino)-8,8'-biquinolyl: investigation of a new chiral ligand architecture. *Synthesis*  
702 **2014**, 46, 678-685.
- 703 (34) Harrigan, P. R.; Stone, C.; Griffin, P.; Nájera, I.; Bloor, S.; Kemp, S.; Tisdale, M.; Larder,  
704 B. Resistance profile of the human immunodeficiency virus type 1 reverse transcriptase inhibitor  
705 abacavir (1592u89) after monotherapy and combination therapy. *J. Infect. Dis.* **2000**, 181, 912-  
706 920.
- 707 (35) Kremb, S.; Helfer, M.; Heller, W.; Hoffmann, D.; Wolff, H.; Kleinschmidt, A.; Cepok, S.;  
708 Hemmer, B.; Durner, J.; Brack-Werner, R. EASY-HIT: HIV full-replication technology for  
709 broad discovery of multiple classes of HIV inhibitors. *Antimicrob. Agents Chemother.* **2010**, 54,  
710 5257-5268.
- 711 (36) Baell, J. B. Feeling nature's PAINS: Natural products, natural product drugs, and pan  
712 assay interference compounds (PAINS). *J. Nat. Prod.* **2016**, 79, 616-628.
- 713 (37) Auld, D. S.; Southall, N. T.; Jadhav, A.; Johnson, R. L.; Diller, D. J.; Simeonov, A.;  
714 Austin, C. P.; Inglese, J. Characterization of chemical libraries for luciferase inhibitory activity.  
715 *J. Med. Chem.* **2008**, 51, 2372-2386.
- 716 (38) Bedford, R.; LePage, D.; Hoffmann, R.; Kennedy, S.; Gutschenritter, T.; Bull, L.;  
717 Sujjantararat, N.; DiCesare, J. C.; Sheaff, R. J. Luciferase inhibition by a novel naphthoquinone. *J.*  
718 *Photochem. Photobiol.* **2012**, 107, 55-64.
- 719 (39) LaPlante, S. R.; Carson, R.; Gillard, J.; Aubry, N.; Coulombe, R.; Bordeleau, S.; Bonneau,  
720 P.; Little, M.; O'Meara, J.; Beaulieu, P. L. Compound aggregation in drug discovery:  
721 implementing a practical NMR assay for medicinal chemists. *J. Med. Chem.* **2013**, 56, 5142-  
722 5150.
- 723 (40) Parniak, M. A.; Min, K.-L.; Budihas, S. R.; Le Grice, S. F.; Beutler, J. A. A fluorescence-  
724 based high-throughput screening assay for inhibitors of human immunodeficiency virus-1  
725 reverse transcriptase-associated ribonuclease H activity. *Anal. Biochem.* **2003**, 322, 33-39.
- 726 (41) Corona, A.; Tramontano, E. RNase H polymerase-independent cleavage assay for  
727 evaluation of RNase H activity of reverse transcriptase enzymes. *Bio Protoc.* **2015**, 5, e1561.
- 728 (42) Klumpp, K.; Hang, J. Q.; Rajendran, S.; Yang, Y.; Derosier, A.; Wong Kai In, P.; Overton,  
729 H.; Parkes, K. E.; Cammack, N.; Martin, J. A. Two-metal ion mechanism of RNA cleavage by  
730 HIV RNase H and mechanism-based design of selective HIV RNase H inhibitors. *Nucleic Acids*  
731 *Res.* **2003**, 31, 6852-6859.
- 732 (43) Budihas, S. R.; Gorshkova, I.; Gaidamakov, S.; Wamiru, A.; Bona, M. K.; Parniak, M. A.;  
733 Crouch, R. J.; McMahon, J. B.; Beutler, J. A.; Le Grice, S. F. Selective inhibition of HIV-1

- 734 reverse transcriptase-associated ribonuclease H activity by hydroxylated tropolones. *Nucleic*  
735 *Acids Res.* **2005**, 33, 1249-1256.
- 736 (44) Beilhartz, G. L.; Ngure, M.; Johns, B. A.; DeAnda, F.; Gerondelis, P.; Götte, M. Inhibition  
737 of the ribonuclease H activity of HIV-1 reverse transcriptase by GSK5750 correlates with slow  
738 enzyme-inhibitor dissociation. *J. Biol. Chem.* **2014**, 289, 16270-16277.
- 739 (45) Vernekar, S. K. V.; Tang, J.; Wu, B.; Huber, A. D.; Casey, M. C.; Myshakina, N.; Wilson,  
740 D. J.; Kankanala, J.; Kirby, K. A.; Parniak, M. A. Double-winged 3-hydroxypyrimidine-2, 4-  
741 diones: potent and selective inhibition against HIV-1 RNase H with significant antiviral activity.  
742 *J. Med. Chem.* **2017**, 60, 5045-5056.
- 743 (46) Boyer, P. L.; Smith, S. J.; Zhao, X. Z.; Das, K.; Gruber, K.; Arnold, E.; Burke, T. R.;  
744 Hughes, S. H. Developing and evaluating inhibitors against the RNase H active site of HIV-1  
745 RT. *J. Virol.* **2018**, 92, 02203-02217.
- 746 (47) Tramontano, E.; Esposito, F.; Badas, R.; Di Santo, R.; Costi, R.; La Colla, P. 6-[1-(4-  
747 Fluorophenyl) methyl-1H-pyrrol-2-yl]-2, 4-dioxo-5-hexenoic acid ethyl ester a novel diketo  
748 acid derivative which selectively inhibits the HIV-1 viral replication in cell culture and the  
749 ribonuclease H activity in vitro. *Antivir. Res.* **2005**, 65, 117-124.
- 750 (48) Chung, S.; Wendeler, M.; Rausch, J. W.; Beilhartz, G.; Gotte, M.; O'Keefe, B. R.;  
751 Bermingham, A.; Beutler, J. A.; Liu, S.; Zhuang, X. Structure-activity analysis of vinylogous  
752 urea inhibitors of human immunodeficiency virus-encoded ribonuclease H. *Antimicrob. Agents*  
753 *Chemother.* **2010**, 54, 3913-3921.
- 754 (49) Masaoka, T.; Chung, S.; Caboni, P.; Rausch, J. W.; Wilson, J. A.; Taskent-Sezgin, H.;  
755 Beutler, J. A.; Tocco, G.; Le Grice, S. F. Exploiting drug-resistant enzymes as tools to identify  
756 thienopyrimidinone inhibitors of human immunodeficiency virus reverse transcriptase-associated  
757 ribonuclease H. *J. Med. Chem.* **2013**, 56, 5436-5445.
- 758 (50) Poongavanam, V.; Corona, A.; Steinmann, C.; Scipione, L.; Grandi, N.; Pandolfi, F.; Di  
759 Santo, R.; Costi, R.; Esposito, F.; Tramontano, E. Structure-guided approach identifies a novel  
760 class of HIV-1 ribonuclease H inhibitors: binding mode insights through magnesium  
761 complexation and site-directed mutagenesis studies. *MedChemComm* **2018**, 9, 562-575.
- 762 (51) Wendeler, M.; Lee, H.-F.; Bermingham, A.; Miller, J. T.; Chertov, O.; Bona, M. K.;  
763 Baichoo, N. S.; Ehteshami, M.; Beutler, J.; O'keefe, B. R. Vinylogous ureas as a novel class of  
764 inhibitors of reverse transcriptase-associated ribonuclease H activity. *ACS Chem. Biol.* **2008**, 3,  
765 635-644.
- 766 (52) Corona, A.; Desantis, J.; Massari, S.; Distinto, S.; Masaoka, T.; Sabatini, S.; Esposito, F.;  
767 Manfroni, G.; Maccioni, E.; Cecchetti, V. Studies on cycloheptathiophene-3-carboxamide  
768 derivatives as allosteric HIV-1 ribonuclease H inhibitors. *ChemMedChem* **2016**, 11, 1709-1720.
- 769 (53) Massari, S.; Corona, A.; Distinto, S.; Desantis, J.; Caredda, A.; Sabatini, S.; Manfroni, G.;  
770 Felicetti, T.; Cecchetti, V.; Pannecouque, C. From cycloheptathiophene-3-carboxamide to  
771 oxazinone-based derivatives as allosteric HIV-1 ribonuclease H inhibitors. *J. Enzyme Inhib.*  
772 *Med. Chem.* **2019**, 34, 55-74.
- 773 (54) Shah, N. B.; Duncan, T. M. Bio-layer interferometry for measuring kinetics of protein-  
774 protein interactions and allosteric ligand effects. *J. Vis. Exp.* **2014**, e51383.
- 775 (55) Kwong, P. D.; Wyatt, R.; Robinson, J.; Sweet, R. W.; Sodroski, J.; Hendrickson, W. A.  
776 Structure of an HIV gp120 envelope glycoprotein in complex with the CD4 receptor and a  
777 neutralizing human antibody. *Nature* **1998**, 393, 648-659.



- 778 (56) Richman, D. D.; Wrin, T.; Little, S. J.; Petropoulos, C. J. Rapid evolution of the  
779 neutralizing antibody response to HIV type 1 infection. *Proc. Natl. Acad. Sci. U.S.A.* **2003**, 100,  
780 4144-4149.
- 781 (57) Kwong, P. D.; Mascola, J. R.; Nabel, G. J. Broadly neutralizing antibodies and the search  
782 for an HIV-1 vaccine: the end of the beginning. *Nat. Rev. Immunol.* **2013**, 13, 693-701.
- 783 (58) Sluis-Cremer, N.; Arion, D.; Parniak, M. A. Destabilization of the HIV-1 reverse  
784 transcriptase dimer upon interaction with N-acyl hydrazone inhibitors. *Mol. Pharmacol.* **2002**,  
785 62, 398-405.
- 786 (59) Vernekar, S. K. V.; Liu, Z.; Nagy, E.; Miller, L.; Kirby, K. A.; Wilson, D. J.; Kankanala,  
787 J.; Sarafianos, S. G.; Parniak, M. A.; Wang, Z. Design, synthesis, biochemical, and antiviral  
788 evaluations of C6 benzyl and C6 biarylmethyl substituted 2-hydroxyisoquinoline-1, 3-diones:  
789 dual inhibition against HIV reverse transcriptase-associated RNase H and polymerase with  
790 antiviral activities. *J. Med. Chem.* **2014**, 58, 651-664.
- 791 (60) Hang, J. Q.; Li, Y.; Yang, Y.; Cammack, N.; Mirzadegan, T.; Klumpp, K. Substrate-  
792 dependent inhibition or stimulation of HIV RNase H activity by non-nucleoside reverse  
793 transcriptase inhibitors (NNRTIs). *Biochem. Biophys. Res. Commun.* **2007**, 352, 341-350.
- 794 (61) Bringmann, G.; Gunther, C.; Ochse, M.; Schupp, O.; Tasler, S. Biaryls in nature: a multi-  
795 faceted class of stereochemically, biosynthetically, and pharmacologically intriguing secondary  
796 metabolites. *Prog. Chem. Org. Nat. Prod.* **2001**, 82, 1-293.
- 797 (62) Platt, E. J.; Bilska, M.; Kozak, S. L.; Kabat, D.; Montefiori, D. C. Evidence that ecotropic  
798 murine leukemia virus contamination in TZM-bl cells does not affect the outcome of neutralizing  
799 antibody assays with human immunodeficiency virus type 1. *J. Virol.* **2009**, 83, 8289-8292.
- 800 (63) Platt, E. J.; Wehrly, K.; Kuhmann, S. E.; Chesebro, B.; Kabat, D. Effects of CCR5 and  
801 CD4 cell surface concentrations on infections by macrophagetropic isolates of human  
802 immunodeficiency virus type 1. *J. Virol.* **1998**, 72, 2855-2864.
- 803 (64) Takeuchi, Y.; McClure, M. O.; Pizzato, M. Identification of gammaretroviruses  
804 constitutively released from cell lines used for human immunodeficiency virus research. *J. Virol.*  
805 **2008**, 82, 12585-12588.
- 806 (65) Wei, X.; Decker, J. M.; Liu, H.; Zhang, Z.; Arani, R. B.; Kilby, J. M.; Saag, M. S.; Wu, X.;  
807 Shaw, G. M.; Kappes, J. C. Emergence of resistant human immunodeficiency virus type 1 in  
808 patients receiving fusion inhibitor (T-20) monotherapy. *Antimicrob. Agents Chemother.* **2002**,  
809 46, 1896-1905.
- 810 (66) Derdeyn, C. A.; Decker, J. M.; Sfakianos, J. N.; Wu, X.; O'Brien, W. A.; Ratner, L.;  
811 Kappes, J. C.; Shaw, G. M.; Hunter, E. Sensitivity of human immunodeficiency virus type 1 to  
812 the fusion inhibitor T-20 is modulated by coreceptor specificity defined by the V3 loop of gp120.  
813 *J. Virol.* **2000**, 74, 8358-8367.
- 814 (67) Le Grice, S. F.; Cameron, C. E.; Benkovic, S. J. Purification and characterization of human  
815 immunodeficiency virus type 1 reverse transcriptase. In *Methods in enzymology*, Elsevier: 1995;  
816 Vol. 262, pp 130-144.
- 817 (68) Montefiori, D. C. Evaluating neutralizing antibodies against HIV, SIV, and SHIV in  
818 luciferase reporter gene assays. *Curr. Protoc. Immunol.* **2005**, 12.11.11-12.11.17.
- 819 (69) Mosmann, T. Rapid colorimetric assay for cellular growth and survival: application to  
820 proliferation and cytotoxicity assays. *J. Immunol. Methods* **1983**, 65, 55-63.

- 821 (70) Baldick, C. J.; Wichroski, M. J.; Pendri, A.; Walsh, A. W.; Fang, J.; Mazzucco, C. E.;  
822 Pokornowski, K. A.; Rose, R. E.; Eggers, B. J.; Hsu, M.; Zhai, W.; Zhai, G.; Gerritz, S. W.;  
823 Poss, M. A.; Meanwell, N. A.; Cockett, M. I.; Tenney, D. J. A novel small molecule inhibitor of  
824 hepatitis C virus entry. *PLoS Pathog* **2010**, *6*, e1001086.
- 825 (71) Lara, H. H.; Ayala-Nuñez, N. V.; Ixtapan-Turrent, L.; Rodríguez-Padilla, C. Mode of  
826 antiviral action of silver nanoparticles against HIV-1. *J. Nanobiotechnology*. **2010**, *8*, 1-10.
- 827 (72) Oshannessy, D. J.; Brighamburke, M.; Soneson, K. K.; Hensley, P.; Brooks, I.  
828 Determination of rate and equilibrium binding constants for macromolecular interactions using  
829 surface plasmon resonance: use of nonlinear least squares analysis methods. *Anal. Biochem.*  
830 **1993**, *212*, 457-468.
- 831  
832

833

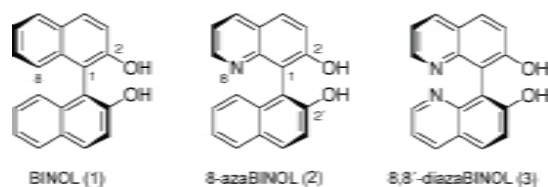

834

835

836 **Figure 1.** 1,1'-Bi-2-naphthol (BINOL, **1**) and related 8-(naphth-1-yl)quinoline (**2**) and 8,8'-biquinolyl (**3**) compounds  
 837 belonging to the 'azaBINOL' class. The colloquial names '8-azaBINOL' and '8,8'-diazabINOL' conform to BINOL  
 838 atom numbering. Molecules are depicted in (*aS*)-configuration and can exist in racemic or scalemic form.  
 839

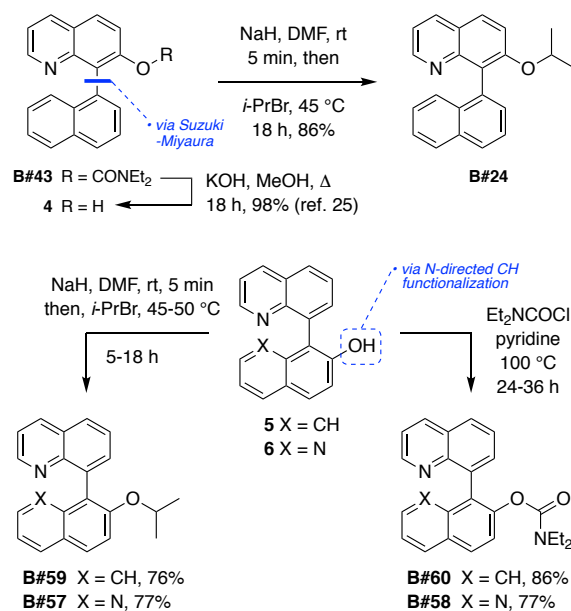

840

841

842 **Scheme 1.** Synthesis of deoxy-8-azaBINOL (**B#24**, **B#43**, **B#59**, and **B#60**) and 2-deoxy-8,8'-diazabINOL (**B#57**  
 843 and **B#58**) derivatives of primary interest for antiviral activity evaluation.

844

845

846

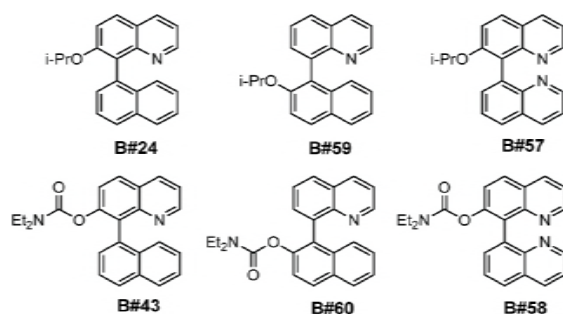

847 **Figure 2.** Structures of selected azaBINOL compounds from synthetic library that show significant antiviral activity  
 848 at single dose concentrations (**B#24**, **B#43**, **B#60**) along with closely related congeners showing only modest  
 849 antiviral activity (**B#59**, **B#58**, **B#57**).  
 850

851  
852  
853  
854  
855

| Compound    | HIV-IC <sub>50</sub> [μM] |             |            | CC <sub>50</sub> [μM] | Selectivity Index<br>CC <sub>50</sub> /IC <sub>50</sub> |
|-------------|---------------------------|-------------|------------|-----------------------|---------------------------------------------------------|
|             | HxB2                      | YU2         | 89.6       | TZM-bl                |                                                         |
| <b>B#24</b> | 6.7 ± 0.9                 | 8.9 ± 0.6   | 4.7 ± 1.6  | 68.5 ± 17.1           | 14.6                                                    |
| <b>B#59</b> | >100                      | >100        | >100       | >100                  | ---                                                     |
| <b>B#57</b> | No effect                 | No effect   | No effect  | No effect             | ---                                                     |
| <b>B#43</b> | 61.4 ± 3.3                | 77.6 ± 10.8 | 56.6 ± 0.8 | 95.0 ± 13.1           | 1.7                                                     |
| <b>B#60</b> | 12.6 ± 1.6                | 14.0 ± 0.8  | 16.8 ± 3.0 | 69.3 ± 4.9            | 5.5                                                     |
| <b>B#58</b> | No effect                 | No effect   | No effect  | No effect             | ---                                                     |

856  
857  
858  
859  
860  
861

**Table 1.** HIV-1 pseudo-viral assay determined IC<sub>50</sub> and CC<sub>50</sub> for selected azaBINOLs.

| Compound    | IC <sub>50</sub> [μM]  | CC <sub>50</sub> [μM] | Selectivity Index<br>CC <sub>50</sub> /IC <sub>50</sub> |
|-------------|------------------------|-----------------------|---------------------------------------------------------|
|             | HIV-1 <sub>III</sub> B | LC5-RIC               |                                                         |
| <b>B#24</b> | 7.6 ± 0.2              | 86.5 ± 3.7            | 11.4                                                    |
| <b>B#59</b> | 39.5 ± 1.7             | 144 ± 7.7             | 3.6                                                     |
| <b>B#57</b> | No effect              | No effect             | ---                                                     |
| <b>B#43</b> | 24.1 ± 0.7             | 51.9 ± 1.2            | 2.2                                                     |
| <b>B#60</b> | 50.1 ± 3.7             | 71.4 ± 2.8            | 1.4                                                     |
| <b>B#58</b> | No effect              | 382.8 ± 166.2         | ---                                                     |

862  
863  
864  
865

**Table 2.** EASY-HIT HIV-1 assay determined IC<sub>50</sub> and CC<sub>50</sub> for selected azaBINOLs.

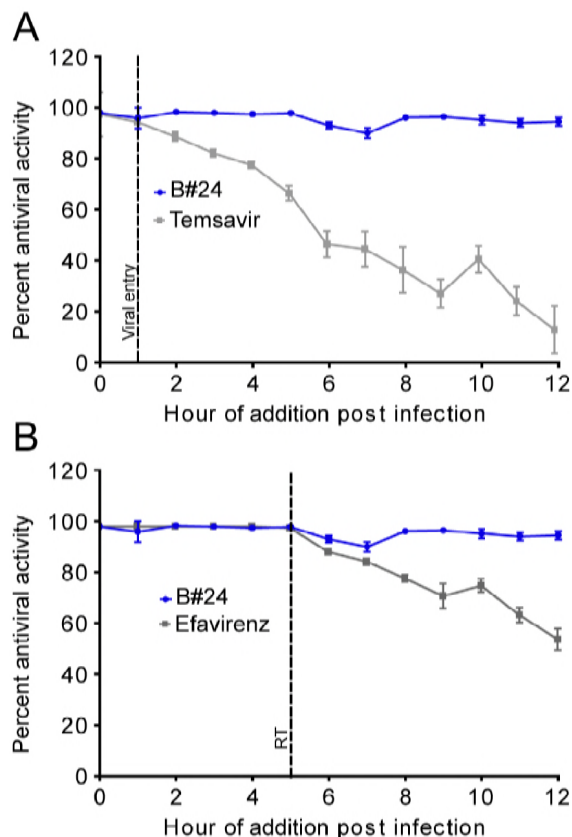

866  
867 **Figure 3.** Time-of-addition analysis comparing HIV-1 antiviral activity of **B#24** to antiviral controls at various time  
868 points post-infection. TZM-bl cells were infected with HIV-1<sub>YU2</sub> followed by inoculation with antiviral agents at the  
869 indicated time points. A) **B#24** activity profile was compared to an attachment inhibitor (temsavir, 40 nM) and B) a  
870 NNRTI (efavirenz, 40 nM). Results are presented as the mean  $\pm$  S.D. (*error bars*) of triplicates ( $n = 3$ ).  
871  
872  
873  
874

|             | HIV-1<br>Integrase    | HIV-1<br>RT  | HIV-1<br>RNase H       | <i>E. coli</i><br>RNase H | MuLV<br>RNase H | AMV<br>RNase H |
|-------------|-----------------------|--------------|------------------------|---------------------------|-----------------|----------------|
| <b>B#24</b> | >100 $\mu$ M          | >100 $\mu$ M | 14.2 $\pm$ 2.8 $\mu$ M | 44.3 $\pm$ 6.4 $\mu$ M    | >100 $\mu$ M    | >100 $\mu$ M   |
| <b>B#57</b> | >100 $\mu$ M          | >100 $\mu$ M | >100 $\mu$ M           | >100 $\mu$ M              | >100 $\mu$ M    | >100 $\mu$ M   |
| Rilpivirine | -                     | ~1 nM        | >10 $\mu$ M            | >10 $\mu$ M               | >10 $\mu$ M     | >10 $\mu$ M    |
| Raltegravir | 1.1 $\pm$ 0.2 $\mu$ M | -            | -                      | -                         | -               | -              |

875  
876  
877 **Table 3.** **B#24** shows specific inhibition against RNase H with an IC<sub>50</sub> of 14.2  $\pm$  2.8  $\mu$ M. **B#57** does not show  
878 inhibition against any enzyme tested. Data shown represent mean  $\pm$  S.D. (*error bars*) of triplicates ( $n = 3$ ).  
879

880

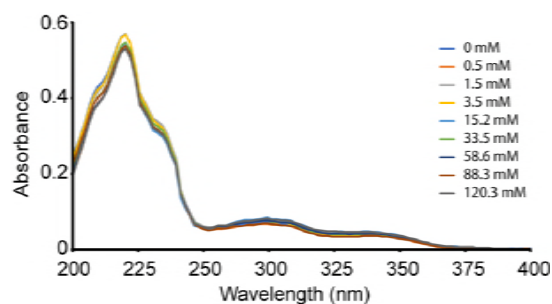

881

882 **Figure 4.** Mg<sup>2+</sup> ion chelation assay. UV absorbance spectra of **B#24** (100 μM) in the presence of varying  
883 concentrations of Mg<sup>2+</sup> ion. No concentration dependent change of absorbance of **B#24** was seen at any wavelength  
884 scanned.

885

886

887

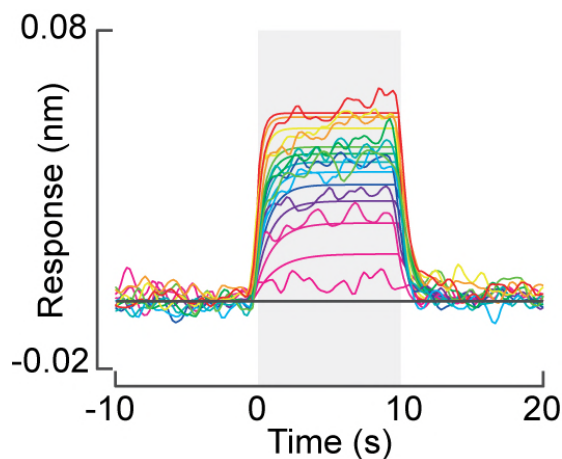

888

889 **Figure 5.** BLI response of inhibitor **B#24** binding to HIV-1 RT enzyme. **B#24** shows a dose-dependent binding  
890 to HIV-1 RT with a  $K_D$  of 38 μM with a 95% confidence interval between 36 – 41 μM. **B#24** was analyzed at 11  
891 concentrations: 10, 20, 30, 40, 50, 60, 70, 80, 120, 160, and 200 μM. Data was fit globally using a 1:1 binding  
892 model.
